# Supplementary material
Source: Royal Society of Chemistry journal article supplement (doi:10.1039/d6tc00464d)
Supplement: d6tc00464d1.pdf [file d6tc00464d1.pdf]

## Supporting Information

### Facile Modification of Multi-resonance Acceptors and Donors in Intramolecular TSCT-TADF Emitters for OLEDs: A Computational Study

Singaravel Nathiya,<sup>1</sup> Murugesan Panneerselvam\*<sup>1,2</sup> and Luciano T Costa\*<sup>1</sup>

<sup>1</sup>MolMod-CS - Instituto de Química, Universidade Federal Fluminense, Campos Valonginho s/n, Centro, Niterói 24020-14, Rio de Janeiro, Brazil.

<sup>2</sup>Programa de Engenharia Química (PEQ/COPPE), Universidade Federal do Rio de Janeiro (UFRJ), Moniz Aragão, Rio de Janeiro, 21941-594, RJ, Brazil.

\*Corresponding Authors: E-mail: [panneerchem130491@gmail.com](mailto:panneerchem130491@gmail.com) & [lucosta@id.uff.br](mailto:lucosta@id.uff.br)

### CONTENT CAPTIONS

| Tables/Figures   |                                                                                                                                                                                                                                                                                                        | Pages      |
|------------------|--------------------------------------------------------------------------------------------------------------------------------------------------------------------------------------------------------------------------------------------------------------------------------------------------------|------------|
| <b>Table S1</b>  | Calculated the HOMO energy of the reference molecules using various functionals at 6-31+G(d) basis set. (All energies are in eV)                                                                                                                                                                       | <b>S2</b>  |
| <b>Table S2</b>  | Calculated the vertical singlet (S <sub>1</sub> ) and triplet (T <sub>1</sub> ) energies, singlet-triplet energy differences ( $\Delta E_{ST}$ ), and absorption wavelength ( $\lambda_{abs}$ ) of reference molecules at 6-31+G(d) basis set along with experimental values. (All energies are in eV) | <b>S2</b>  |
| <b>Table S3</b>  | Calculated bond angles (°) and dihedral angles (°) for designed molecules at optimized S <sub>0</sub> state at B3LYP/6-31+G(d) level of theory.                                                                                                                                                        | <b>S2</b>  |
| <b>Table S4</b>  | Calculated the emission ( $\lambda_{emi}$ ) wavelength (in nm), overlap extent ( $\lambda_{OC}$ in %) for vertical singlet (S <sub>1</sub> ) and triplet (T <sub>1</sub> ) energies, and oscillator strength ( $f_{emi}$ ) at PBE0/6-31+G(d) level of theory.                                          | <b>S3</b>  |
| <b>Table S5</b>  | Charge transfer analysis based on the S <sub>1</sub> state through interfragment charge transfer (IFCT) among the designed molecular fragments.                                                                                                                                                        | <b>S5</b>  |
| <b>Table S6</b>  | Calculated the intramolecular reorganization energies for selected molecules at PBE1PBE/6-31+G(d) level of theory.                                                                                                                                                                                     | <b>S6</b>  |
| <b>Table S7</b>  | Calculated the delayed fluorescence rate ( $K_{TADF}$ in 10 <sup>+05</sup> s <sup>-1</sup> ), internal quantum efficiency ( $\Phi_{IQE}$ ), external quantum efficiency ( $\Phi_{EQE}$ %), photoluminescence quantum yield (PLQY %), and (FWHM nm) for three molecules.                                | <b>S7</b>  |
| <b>Table S8</b>  | Calculated the Huang-Rhys factors for molecule 1.                                                                                                                                                                                                                                                      | <b>S7</b>  |
| <b>Figure S1</b> | Structural comparison between the crystal structure (violet) and the optimized S <sub>1</sub> state (red) of molecule (1), calculated using various functionals with the 6-31+G(d) basis set.                                                                                                          | <b>S8</b>  |
| <b>Figure S2</b> | Comparison of HOMO energy for experimental molecules with computed results at different functionals with 6-31+G(d) basis set.                                                                                                                                                                          | <b>S9</b>  |
| <b>Figure S3</b> | Comparison of absorption wavelength ( $\lambda_{abs}$ ) for experimental molecules with computed results at different functionals with 6-31+G(d) basis set.                                                                                                                                            | <b>S9</b>  |
| <b>Figure S4</b> | Optimized geometry of designed molecules (1-9) at B3LYP/6-31+G(d) level of theory.                                                                                                                                                                                                                     | <b>S10</b> |
| <b>Figure S5</b> | Optimized geometry of designed molecules (10-18) at B3LYP/6-31+G(d) level of theory.                                                                                                                                                                                                                   | <b>S11</b> |

|                   |                                                                                                                                                             |            |
|-------------------|-------------------------------------------------------------------------------------------------------------------------------------------------------------|------------|
| <b>Figure S6</b>  | The selected bond length ( $l$ ), dihedral angles ( $\delta$ ), and bond angle ( $\theta$ ) for designed molecules                                          | <b>S12</b> |
| <b>Figure S7</b>  | Structural differences between the $S_1$ and $T_1$ states for designed molecules (color codes: blue for $S_1$ and red for $T_1$ ).                          | <b>S12</b> |
| <b>Figure S8</b>  | Structural differences between the $S_0$ and $S_1$ states for designed molecules (color codes: green for $S_0$ and blue for $S_1$ ).                        | <b>S13</b> |
| <b>Figure S9</b>  | Visualization of non-covalent interactions (NCI) through RDG isosurfaces and scatter plots for (10-18) molecules.                                           | <b>S13</b> |
| <b>Figure S10</b> | Frontier molecular orbital (FMOs) and optimized geometries of core donors (iso-surface value = 0.02 au) using B3LYP/6-31+G(d) level of theory.              | <b>S14</b> |
| <b>Figure S11</b> | Frontier molecular orbital (FMOs) and optimized geometries of core acceptors (iso-surface value = 0.02 au) using B3LYP/6-31+G(d) level of theory.           | <b>S14</b> |
| <b>Figure S12</b> | NTOs (iso-surface value = 0.02 a.u.) of designed molecules for $T_1$ state at PBE0/6-31+G(d) in the toluene medium.                                         | <b>S15</b> |
| <b>Figure S13</b> | NTOs (iso-surface value = 0.02 a.u.) of designed molecules for $T_2$ state at PBE0/6-31+G(d) in the toluene medium.                                         | <b>S16</b> |
| <b>Figure S14</b> | NTOs (iso-surface value = 0.02 a.u.) of designed molecules for $T_3$ state at PBE0/6-31+G(d) in the toluene medium.                                         | <b>S17</b> |
| <b>Figure S15</b> | Spin density distributions of the designed molecules in their $T_1$ state, computed at the PBE0/6-31+G(d) level of theory.                                  | <b>S18</b> |
| <b>Figure S16</b> | The effective rate RISC rate ( $K_{RISC}^{eff}$ ) constant for all designed molecules.                                                                      | <b>S18</b> |
| <b>Figure S17</b> | Calculated HR factors of all vibrational modes and reorganization energy (in red colour) in the $S_1 \rightarrow S_0$ transition of molecules 1, 4, 5, & 6. | <b>S19</b> |

**Table S1.** Calculated the HOMO energies of the reference molecules using various functionals at 6-31+G(d) basis set. (All energies are in eV)

| Molecules   | B3LYP        | PBE0  | M06   | M06-2X | CAM-B3LYP | WB97XD | Exp. <sup>1</sup> |
|-------------|--------------|-------|-------|--------|-----------|--------|-------------------|
| <b>HOMO</b> |              |       |       |        |           |        |                   |
| <b>1</b>    | <b>-5.52</b> | -5.68 | -5.77 | -6.64  | -6.77     | -7.30  | <b>-5.48</b>      |
| <b>10</b>   | <b>-5.56</b> | -5.73 | -5.82 | -6.67  | -6.81     | -7.30  | <b>-5.53</b>      |

**Table S2.** Calculated the vertical singlet (S<sub>1</sub>) and triplet (T<sub>1</sub>) energies, singlet-triplet energy differences ( $\Delta E_{ST}$ ), and absorption wavelength ( $\lambda_{abs}$  in nm) of reference molecules at 6-31+G(d) basis set along with experimental values. (All energies are in eV)

| Molecules                         | B3LYP | PBE0        | M06  | M06-2X | CAM-B3LYP | WB97XD | Exp. <sup>1</sup> |
|-----------------------------------|-------|-------------|------|--------|-----------|--------|-------------------|
| <b>S<sub>1</sub></b>              |       |             |      |        |           |        |                   |
| 1                                 | 3.07  | <b>3.26</b> | 3.34 | 3.81   | 3.82      | 3.88   | -                 |
| 10                                | 3.11  | <b>3.29</b> | 3.38 | 3.82   | 3.83      | 3.88   | -                 |
| <b>T<sub>1</sub></b>              |       |             |      |        |           |        |                   |
| 1                                 | 2.85  | <b>2.90</b> | 2.88 | 3.24   | 2.91      | 3.07   | -                 |
| 10                                | 2.86  | <b>2.91</b> | 2.89 | 3.25   | 2.92      | 3.08   | -                 |
| <b><math>\Delta E_{ST}</math></b> |       |             |      |        |           |        |                   |
| 1                                 | 0.21  | <b>0.36</b> | 0.46 | 0.57   | 0.92      | 0.81   | <b>0.28</b>       |
| 10                                | 0.25  | <b>0.39</b> | 0.49 | 0.57   | 0.91      | 0.80   | <b>0.31</b>       |
| <b><math>\lambda_{abs}</math></b> |       |             |      |        |           |        |                   |
| 1                                 | 404   | <b>380</b>  | 370  | 325    | 324       | 319    | <b>378</b>        |
| 10                                | 399   | <b>376</b>  | 366  | 324    | 323       | 319    | <b>380</b>        |

**Table S3.** Calculated bond angles (°) and dihedral angles (°) for designed molecules at optimized S<sub>0</sub> state at B3LYP/6-31+G(d) level of theory.

| Molecules | $\delta_1$ | $\delta_2$ | $\delta_3$ | $\delta_4$ | $\theta_1$ | $\theta_2$ |
|-----------|------------|------------|------------|------------|------------|------------|
| <b>1</b>  | -120.63    | 55.45      | -105.52    | 71.44      | 131.12     | 122.38     |
| <b>2</b>  | -119.88    | 56.35      | -106.48    | 70.65      | 131.21     | 104.91     |
| <b>3</b>  | -119.44    | 57.23      | -107.85    | 69.48      | 131.14     | 99.46      |
| <b>4</b>  | -120.66    | 55.54      | -103.37    | 73.31      | 131.22     | 122.42     |
| <b>5</b>  | -126.21    | 57.94      | -106.86    | 70.05      | 131.32     | 104.88     |
| <b>6</b>  | -131.85    | 53.33      | -102.66    | 74.04      | 131.39     | 100.06     |
| <b>7</b>  | -132.42    | 53.00      | -108.77    | 67.13      | 131.20     | 122.41     |
| <b>8</b>  | -128.78    | 56.22      | -111.83    | 64.16      | 131.56     | 104.98     |
| <b>9</b>  | -127.55    | 57.34      | -112.65    | 63.43      | 131.55     | 99.70      |
| <b>10</b> | -125.64    | 57.95      | -104.58    | 71.96      | 131.03     | 122.41     |
| <b>11</b> | -125.36    | 58.06      | -103.71    | 72.99      | 131.07     | 104.91     |
| <b>12</b> | -118.22    | 58.86      | -104.17    | 72.67      | 130.96     | 99.52      |
| <b>13</b> | -116.58    | 59.54      | -100.97    | 75.54      | 131.07     | 122.45     |

|           |         |        |         |        |        |        |
|-----------|---------|--------|---------|--------|--------|--------|
| <b>14</b> | -117.14 | 58.79  | -103.84 | 72.72  | 131.27 | 104.93 |
| <b>15</b> | -116.77 | 59.28  | -104.86 | 71.91  | 131.24 | 99.66  |
| <b>16</b> | 122.41  | -53.09 | 105.27  | -70.81 | 130.77 | 122.45 |
| <b>17</b> | -120.92 | 54.98  | -108.49 | 67.89  | 131.16 | 104.98 |
| <b>18</b> | -120.18 | 55.73  | -110.18 | 66.22  | 131.16 | 99.70  |

**Table S4.** Calculated the emission ( $\lambda_{emi}$ ) wavelength (in nm), overlap extent ( $\lambda_{OC}$  in %) for vertical singlet ( $S_1$ ) and triplet ( $T_1$ ) energies, and oscillator strength ( $f_{emi}$ ) at PBE0/6-31+G(d) level of theory using toluene.

| Molecules | $\lambda_{emi}$ | $\lambda_{OC}$ |       | $f_{emi}$ |
|-----------|-----------------|----------------|-------|-----------|
|           |                 | $S_1$          | $T_1$ |           |
| <b>1</b>  | 420.02          | 0.20           | 0.61  | 0.035     |
| <b>2</b>  | 469.55          | 0.51           | 0.54  | 0.021     |
| <b>3</b>  | 483.32          | 0.50           | 0.52  | 0.020     |
| <b>4</b>  | 511.07          | 0.13           | 0.24  | 0.007     |
| <b>5</b>  | 581.66          | 0.13           | 0.51  | 0.003     |
| <b>6</b>  | 605.29          | 0.15           | 0.44  | 0.009     |
| <b>7</b>  | 471.56          | 0.05           | 0.59  | 0.001     |
| <b>8</b>  | 539.12          | 0.05           | 0.59  | 0.000     |
| <b>9</b>  | 558.32          | 0.05           | 0.55  | 0.001     |
| <b>10</b> | 415.7           | 0.19           | 0.61  | 0.032     |
| <b>11</b> | 462.68          | 0.55           | 0.56  | 0.024     |
| <b>12</b> | 476.44          | 0.51           | 0.53  | 0.024     |
| <b>13</b> | 483.91          | 0.15           | 0.54  | 0.004     |
| <b>14</b> | 541.91          | 0.18           | 0.48  | 0.005     |
| <b>15</b> | 556.67          | 0.19           | 0.47  | 0.011     |
| <b>16</b> | 486.43          | 0.05           | 0.62  | 0.001     |
| <b>17</b> | 554.17          | 0.09           | 0.59  | 0.000     |
| <b>18</b> | 552.89          | 0.09           | 0.55  | 0.006     |

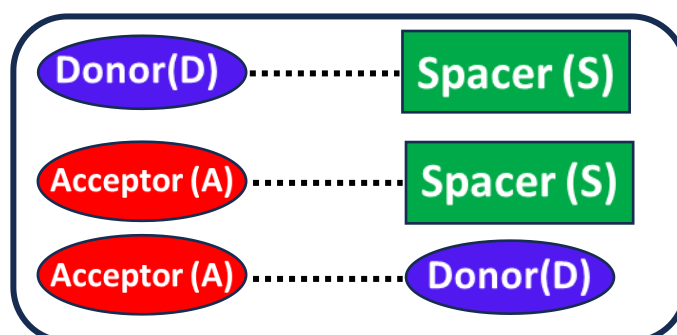

**Table S5:** Charge transfer analysis based on the S<sub>1</sub> state through interfragment charge transfer (IFCT) among the designed molecular fragments.

| Molecules | D-S     | A-S     | A-D        | CT     | LE     |
|-----------|---------|---------|------------|--------|--------|
| 1         | -0.0133 | -0.5833 | -0.3300    | 94.21  | 57.80  |
| 2         | -0.0025 | 0.0270  | -0.0405    | 13.159 | 86.841 |
| 3         | -0.0015 | 0.0345  | -0.0226    | 10.055 | 89.343 |
| 4         | -0.0368 | -0.1982 | -0.7309    | 97.208 | 2.792  |
| 5         | -0.0343 | -0.1887 | -0.7448    | 97.307 | 2.693  |
| 6         | -0.0378 | -0.1792 | : -0.74182 | 96.531 | 3.469  |
| 7         | -0.0601 | -0.0020 | -0.9238    | 98.604 | 1.396  |
| 8         | -0.0521 | -0.0040 | -0.9289    | 98.52  | 1.48   |
| 9         | -0.0477 | -0.0050 | -0.9317    | 98.478 | 1.522  |
| 10        | -0.0123 | -0.5399 | -0.3738    | 94.689 | 5.311  |
| 11        | -0.0039 | 0.0345  | -0.0605    | 15.067 | 84.933 |
| 12        | -0.0026 | 0.0349  | -0.0401    | 12.556 | 87.444 |
| 13        | -0.0217 | -0.3629 | -0.5710    | 96.611 | 3.389  |
| 14        | -0.0282 | -0.2146 | -0.6630    | 91.865 | 8.135  |
| 15        | -0.0263 | -0.1918 | -0.6560    | 88.966 | 11.034 |
| 16        | -0.0658 | -0.0035 | -0.9102    | 97.98  | 2.02   |
| 17        | -0.0554 | -0.0122 | -0.9107    | 97.925 | 2.075  |
| 18        | -0.0512 | -0.0133 | -0.9134    | 97.898 | 2.102  |

### Additional Computational Details

The intramolecular re-organization energy for the RISC rate is,

$$\lambda_{\text{RISC}} = E_{\text{T}}^{\text{S}} - E_{\text{S}}^{\text{S}} \quad (1)$$

where  $E_{\text{T}}^{\text{S}}$  represent the energy of the singlet state at the triplet state geometry, and  $E_{\text{S}}^{\text{S}}$  represent the energy of the singlet state at the singlet state geometry. In this regard, the intramolecular reorganization energy for RISC is calculated for selected molecules. The overall reorganization energy encompasses both intramolecular reorganization and contributions from the external environment. Therefore, when determining the rates of ISC and RISC, we factored in a total reorganization energy of 0.20 eV. This value encapsulates the effects of relaxations induced by the medium, a topic extensively discussed in previous studies.<sup>2</sup>

**Table S6.** Calculated the intramolecular reorganization energies for selected molecules at PBE1PBE/6-31+G(d) level of theory.

| Molecules | $E_{S1}$          | $E^*_{S1}$        | $\Lambda$ (in Hartree) | $\lambda$ (in eV) |
|-----------|-------------------|-------------------|------------------------|-------------------|
|           | ( $S_1$ geometry) | ( $T_1$ geometry) | $S_1-T_1$              | $S_1-T_1$         |
| <b>1</b>  | -2443.0578        | -2443.0513        | 0.0065                 | 0.18              |
| <b>4</b>  | -2444.2395        | -2444.2384        | 0.0011                 | 0.03              |
| <b>7</b>  | -2560.8448        | -2560.8397        | 0.0051                 | 0.14              |
| <b>10</b> | -2459.0847        | -2459.0782        | 0.0065                 | 0.18              |
| <b>11</b> | -3104.8711        | -3104.8681        | 0.0030                 | 0.08              |
| <b>12</b> | -7107.0161        | -7107.0103        | 0.058                  | 0.16              |

### Delayed fluorescence rate, Quantum yields, Internal, and External quantum efficiency<sup>3-5</sup>

The delayed fluorescence rate constant can be calculated theoretically by using the equation,

$$K_{TADF}^{-1} = K_r^{-1} + K_{RISC}^{-1} \quad (2)$$

The external quantum efficiency ( $\Phi_{EQE}$ ) can be calculated by,

$$\Phi_{EQE} = \Phi_{IQE} * \eta_{out} \quad (3)$$

The value of the output sheet coupling ( $\eta_{out}$ ) typically ranges between 0.2 and 0.3.

The internal quantum efficiency ( $\Phi_{IQE}$ ) can be calculated by,

$$\Phi_{IQE} = \eta_r(S_1) \Phi_r + \eta_r(S_1) \Phi_{ISC} \Phi_{RISC} + \eta_r(T_1) \Phi_{RISC} \quad (4)$$

where  $\eta_r(S_1) = 0.25$  and  $\eta_r(T_1) = 0.75$  are the branching ratios of the formation of singlet and triplet excitons, respectively. The efficiency of radiative ( $\Phi_r$ ), inter-system crossing ( $\Phi_{ISC}$ ), and reverse-intersystem crossing rate ( $\Phi_{RISC}$ ) can be calculated by,

$$\Phi_r = 1 - \Phi_{ISC} \quad (5)$$

$$\Phi_{ISC} = \frac{K_{ISC}}{K_r} \quad (6)$$

$$\Phi_{\text{RISC}} = \frac{\Phi_{\text{TADF}}}{\Phi_{\text{ISC}}} \quad (7)$$

$$\Phi_{\text{TADF}} = \frac{K_{\text{ISC}} * \Phi_{\text{r}} * K_{\text{RISC}}}{K_{\text{r}} * K_{\text{TADF}}} \quad (8)$$

The photoluminescence quantum yield (PLQY) can be calculated by,

$$\text{PLQY} = \Phi_{\text{r}} + \Phi_{\text{TADF}} \quad (9)$$

**Table S7.** Calculated the delayed fluorescence rate ( $K_{\text{TADF}}$  in  $10^{+05} \text{ s}^{-1}$ ), internal quantum efficiency ( $\Phi_{\text{IQE}}$ ), external quantum efficiency ( $\Phi_{\text{EQE}}$  %), photoluminescence quantum yield (PLQY %), and (FWHM in nm) for three molecules.

| Molecules | $K_{\text{TADF}}$ | $\Phi_{\text{IQE}}$ | $\Phi_{\text{EQE}}$ | PLQY  | FWHM |
|-----------|-------------------|---------------------|---------------------|-------|------|
| 4         | 2.75              | 0.99                | 24.68               | 99.77 | 35   |
| 5         | 2.07              | 0.60                | 14.74               | 77.17 | 60   |
| 6         | 12.9              | -                   | -                   | -     | 48   |

**Table S8.** Calculated the Huang-Rhys factors for molecule 1.

| Mode | Huang-Rhys factors | Frequency |
|------|--------------------|-----------|
| 1    | 1.71               | 9.3765    |
| 2    | 6.33               | 11.4439   |
| 3    | 12.53              | 15.8225   |
| 4    | 0.12               | 21.0183   |
| 5    | 0.10               | 24.9996   |
| 6    | 0.51               | 32.4219   |
| 7    | 0.13               | 32.858    |
| 10   | 0.04               | 51.2839   |
| 11   | 0.17               | 56.0157   |
| 12   | 0.34               | 59.5836   |
| 14   | 0.12               | 74.5586   |
| 15   | 0.01               | 76.5916   |
| 16   | 0.14               | 81.6699   |
| 17   | 0.03               | 94.6635   |
| 18   | 0.49               | 101.2088  |
| 19   | 0.01               | 112.5404  |
| 20   | 0.01               | 126.5712  |
| 21   | 0.31               | 130.4807  |
| 22   | 0.30               | 143.2584  |
| 23   | 0.11               | 149.4476  |
| 24   | 0.02               | 156.4414  |
| 28   | 0.07               | 207.2308  |

|     |      |           |
|-----|------|-----------|
| 29  | 0.06 | 214.5698  |
| 30  | 0.35 | 230.2214  |
| 31  | 0.02 | 233.1291  |
| 33  | 0.01 | 243.0192  |
| 35  | 0.06 | 248.1499  |
| 36  | 0.01 | 264.2723  |
| 41  | 0.01 | 290.1434  |
| 42  | 0.05 | 296.2565  |
| 43  | 0.02 | 297.9415  |
| 44  | 0.01 | 299.7628  |
| 45  | 0.07 | 309.8171  |
| 50  | 0.02 | 348.6109  |
| 52  | 0.02 | 362.0539  |
| 55  | 0.05 | 384.5339  |
| 56  | 0.02 | 403.0138  |
| 58  | 0.58 | 423.7637  |
| 59  | 0.30 | 429.0714  |
| 60  | 0.01 | 430.0193  |
| 63  | 0.21 | 445.0311  |
| 64  | 0.02 | 447.6789  |
| 65  | 0.68 | 450.5864  |
| 66  | 0.06 | 454.1103  |
| 67  | 0.02 | 460.4182  |
| 68  | 0.02 | 460.894   |
| 69  | 0.02 | 476.5854  |
| 71  | 0.03 | 488.517   |
| 77  | 0.01 | 545.7835  |
| 78  | 0.02 | 569.831   |
| 87  | 0.01 | 628.9832  |
| 92  | 0.02 | 663.4708  |
| 93  | 0.01 | 669.6923  |
| 95  | 0.04 | 677.1641  |
| 96  | 0.02 | 687.0778  |
| 100 | 0.05 | 742.421   |
| 107 | 0.11 | 768.0739  |
| 111 | 0.01 | 782.6454  |
| 112 | 0.01 | 784.5857  |
| 119 | 0.02 | 855.0778  |
| 160 | 0.07 | 1059.417  |
| 169 | 0.01 | 1128.2013 |
| 170 | 0.01 | 1137.2777 |

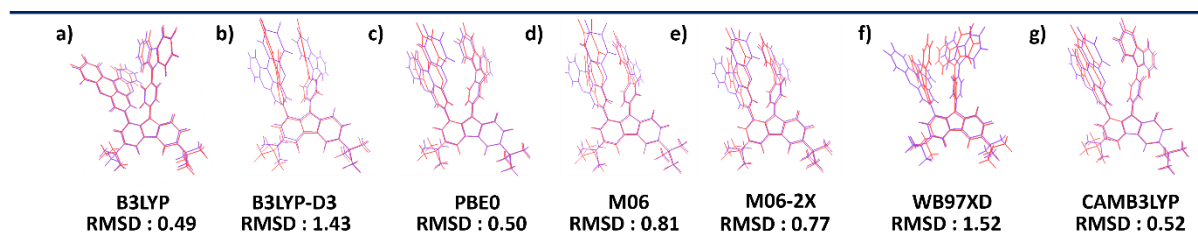

**Figure S1.** Structural comparison between the crystal structure (violet) and the optimized  $S_0$  state (red) of molecule (1), calculated using various functionals with the 6-31+G(d) basis set.

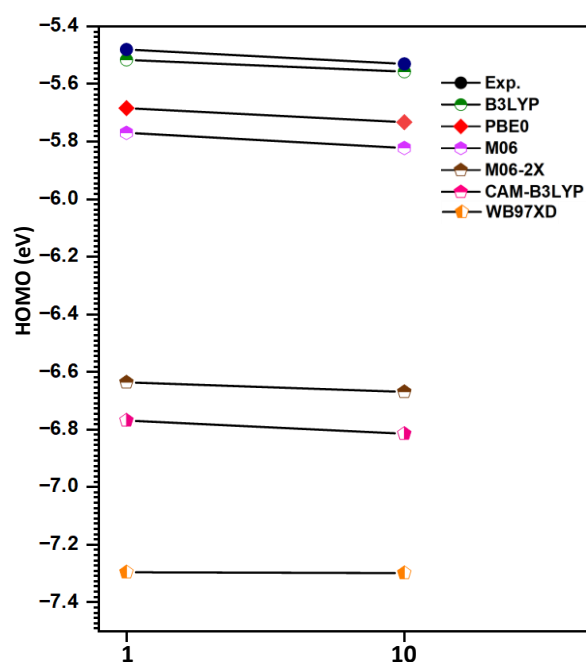

**Figure S2.** Comparison of HOMO energy for experimental molecules with computed results at different functionals with 6-31+G(d) basis set.

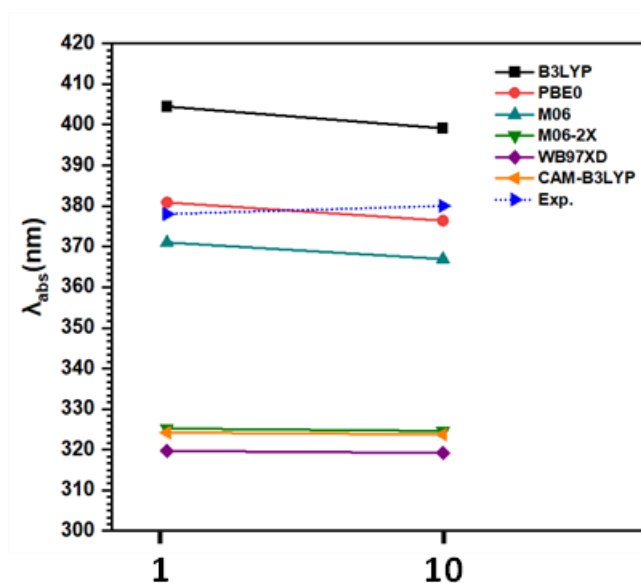

**Figure S3.** Comparison of absorption wavelength ( $\lambda_{\text{abs}}$ ) for experimental molecules with computed results at different functionals with 6-31+G(d) basis set.

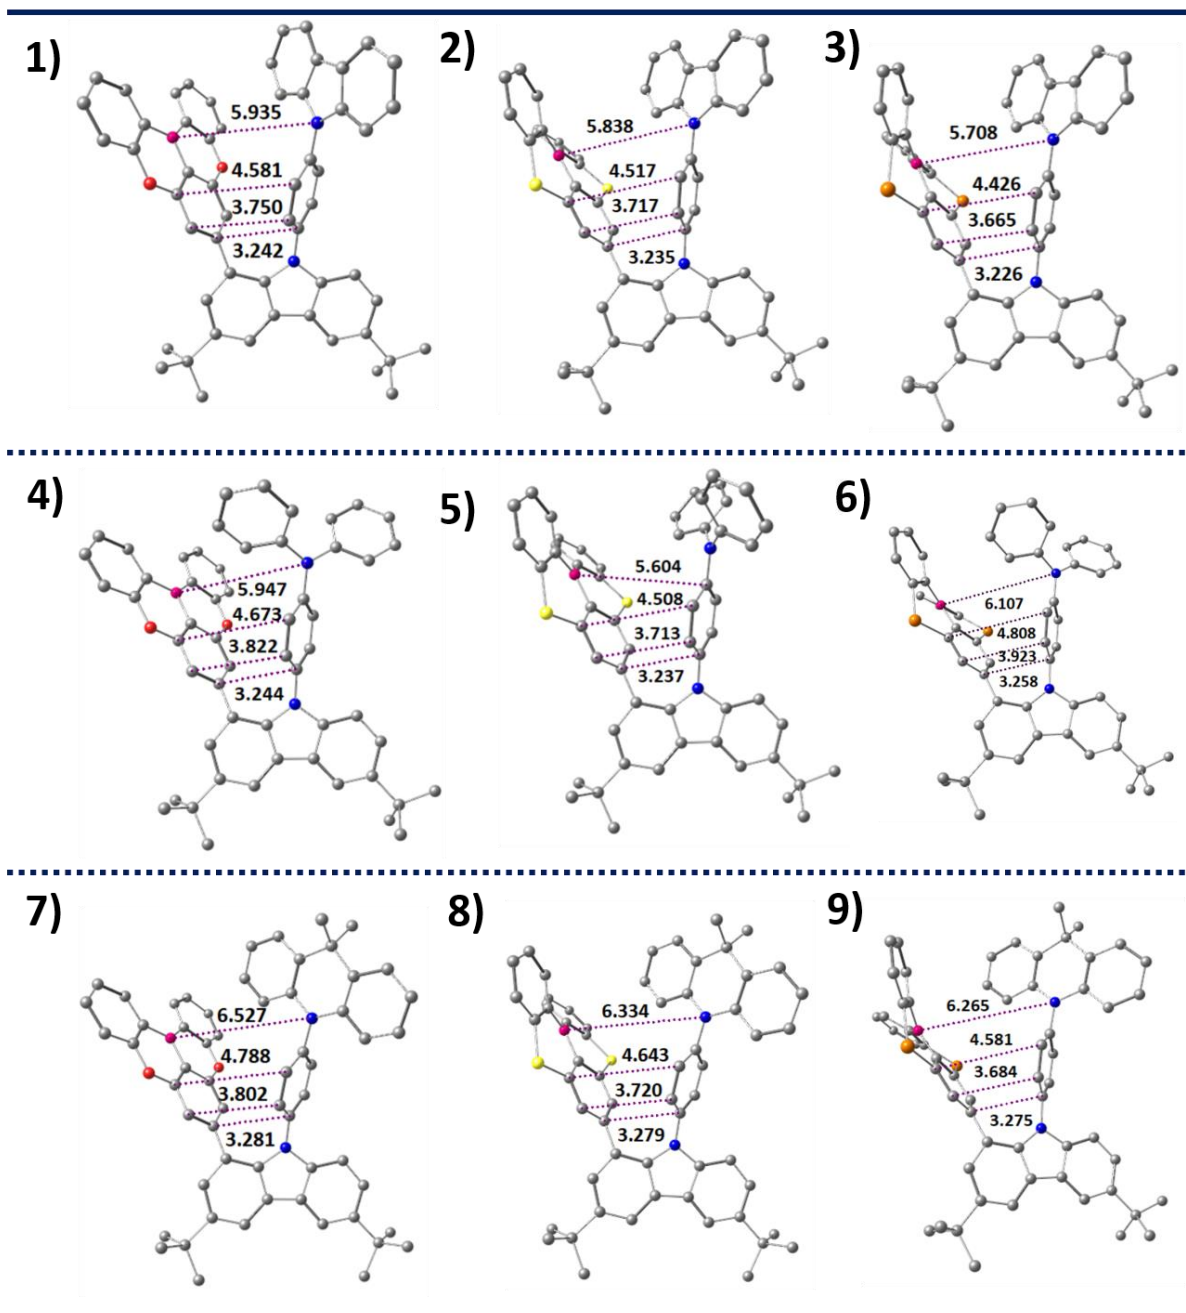

**Figure S4.** Optimized geometry of designed molecules (1-9) at B3LYP/6-31+G(d) level of theory.

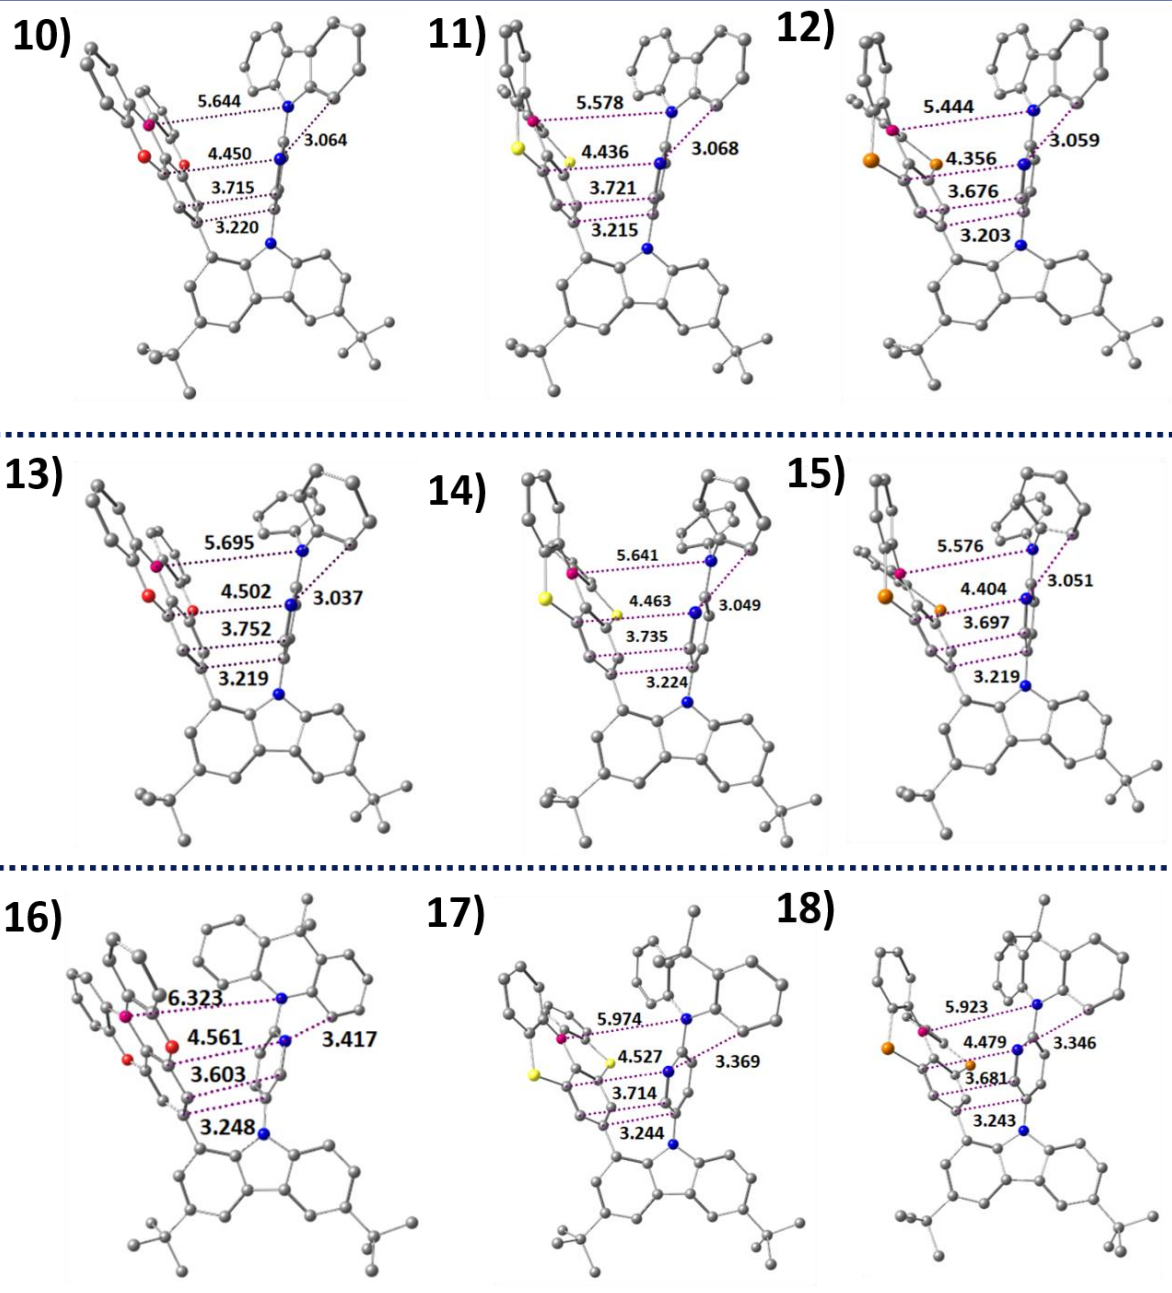

**Figure S5.** Optimized geometry of designed molecules (10-18) at B3LYP/6-31+G(d) level of theory.

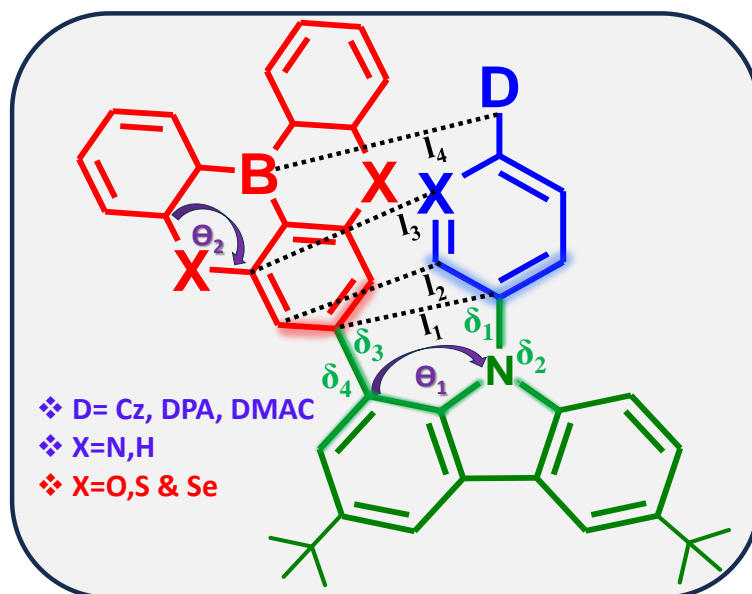

**Figure S6.** The selected bond length ( $l$ ), dihedral angles ( $\delta$ ), and bond angle ( $\theta$ ) for designed molecules.

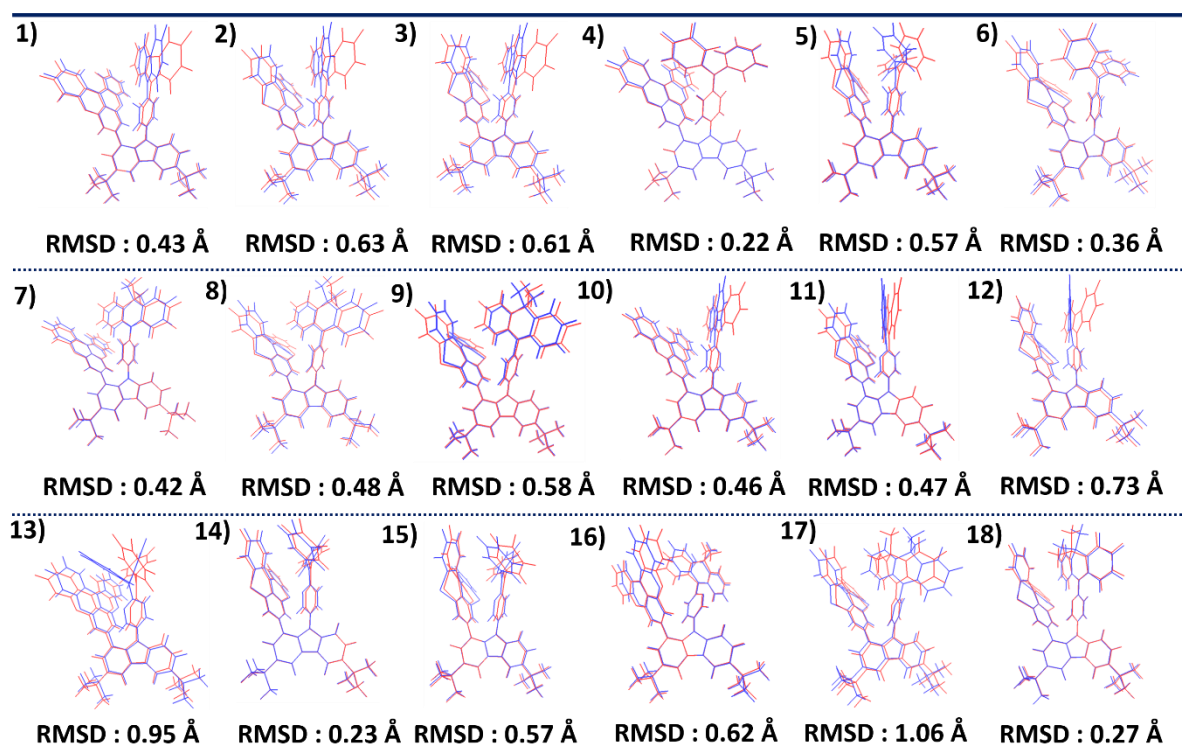

**Figure S7.** Structural differences between the  $S_1$  and  $T_1$  states for designed molecules (color codes: blue for  $S_1$  and red for  $T_1$ ).

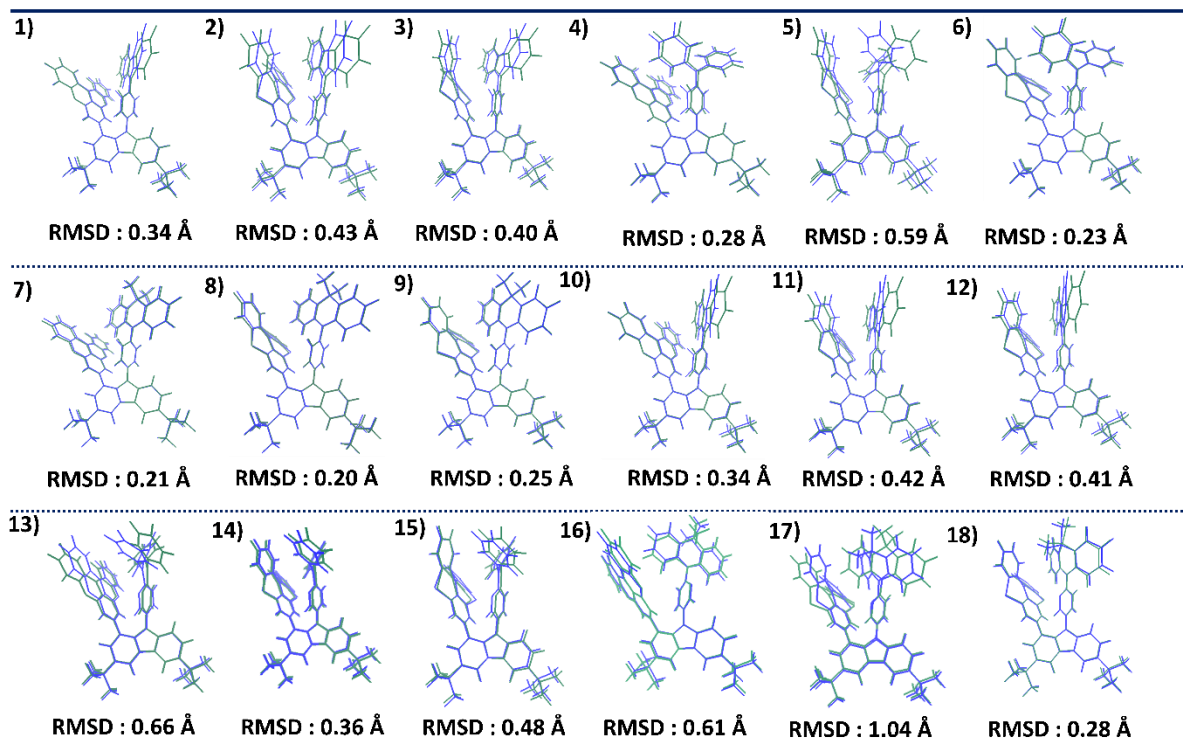

**Figure S8.** Structural differences between the  $S_0$  and  $S_1$  states for designed molecules (color codes: green for  $S_0$  and blue for  $S_1$ ).

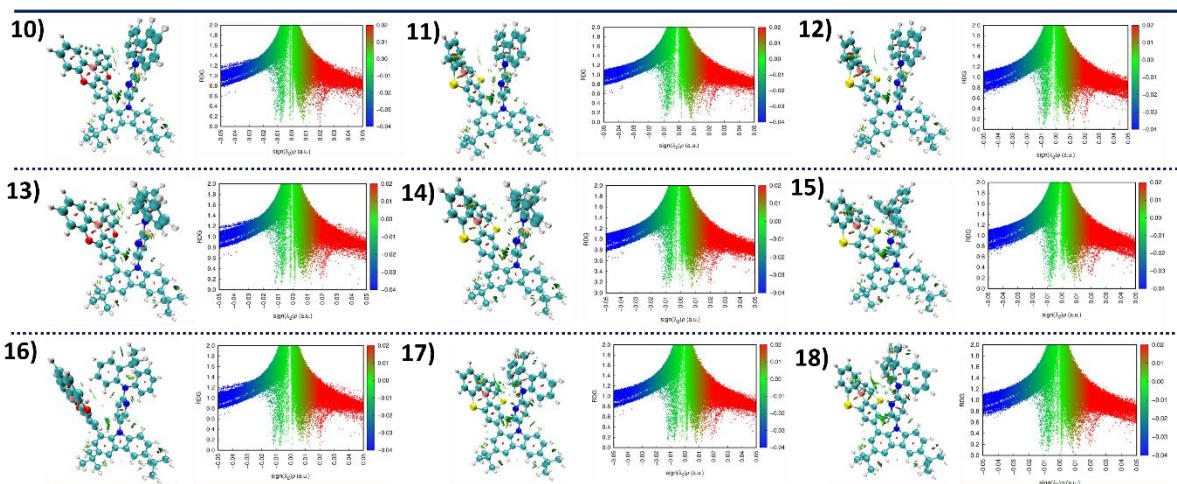

**Figure S9.** Visualization of non-covalent interactions (NCI) through RDG isosurfaces and scatter plots for (10-18) molecules.

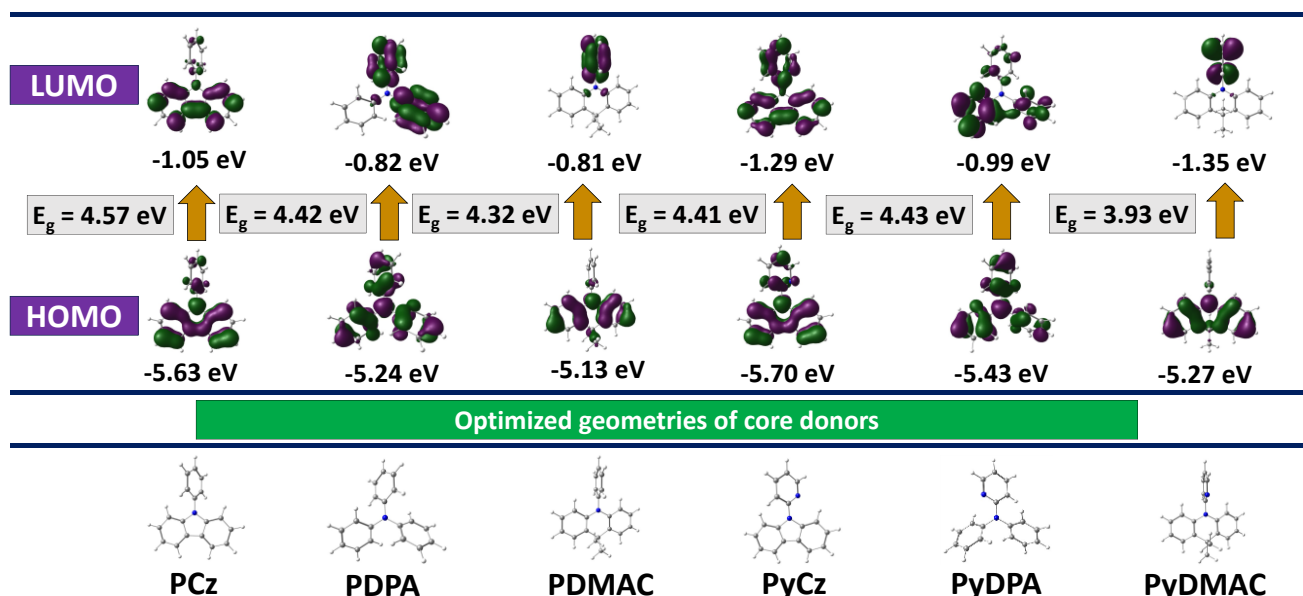

**Figure S10.** Frontier molecular orbital (FMOs) and optimized geometries of core donors (iso-surface value = 0.02 au) using B3LYP/6-31+G(d) level of theory.

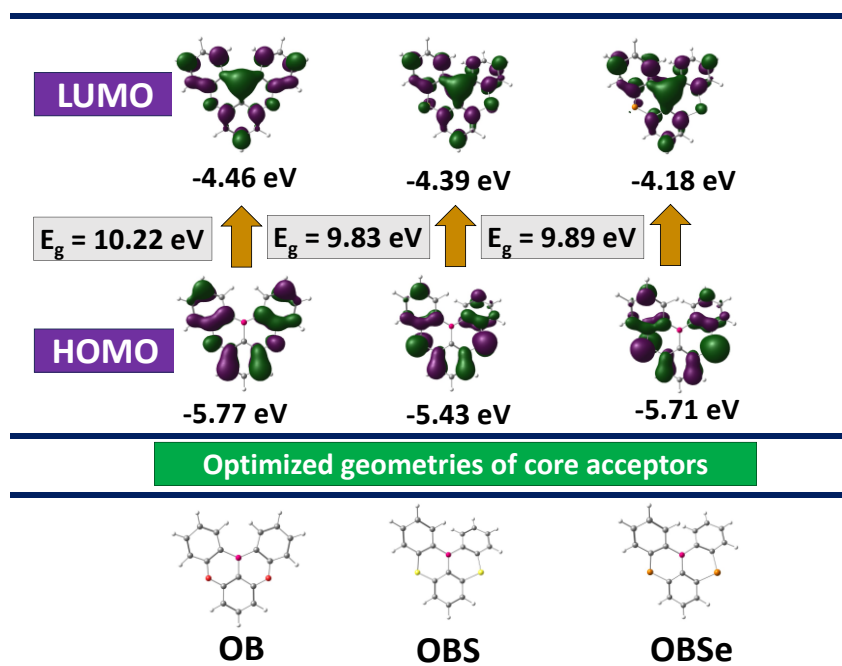

**Figure S11.** Frontier molecular orbitals (FMOs) and optimized geometries of core acceptors (iso-surface value = 0.02 au) using B3LYP/6-31+G(d) level of theory.

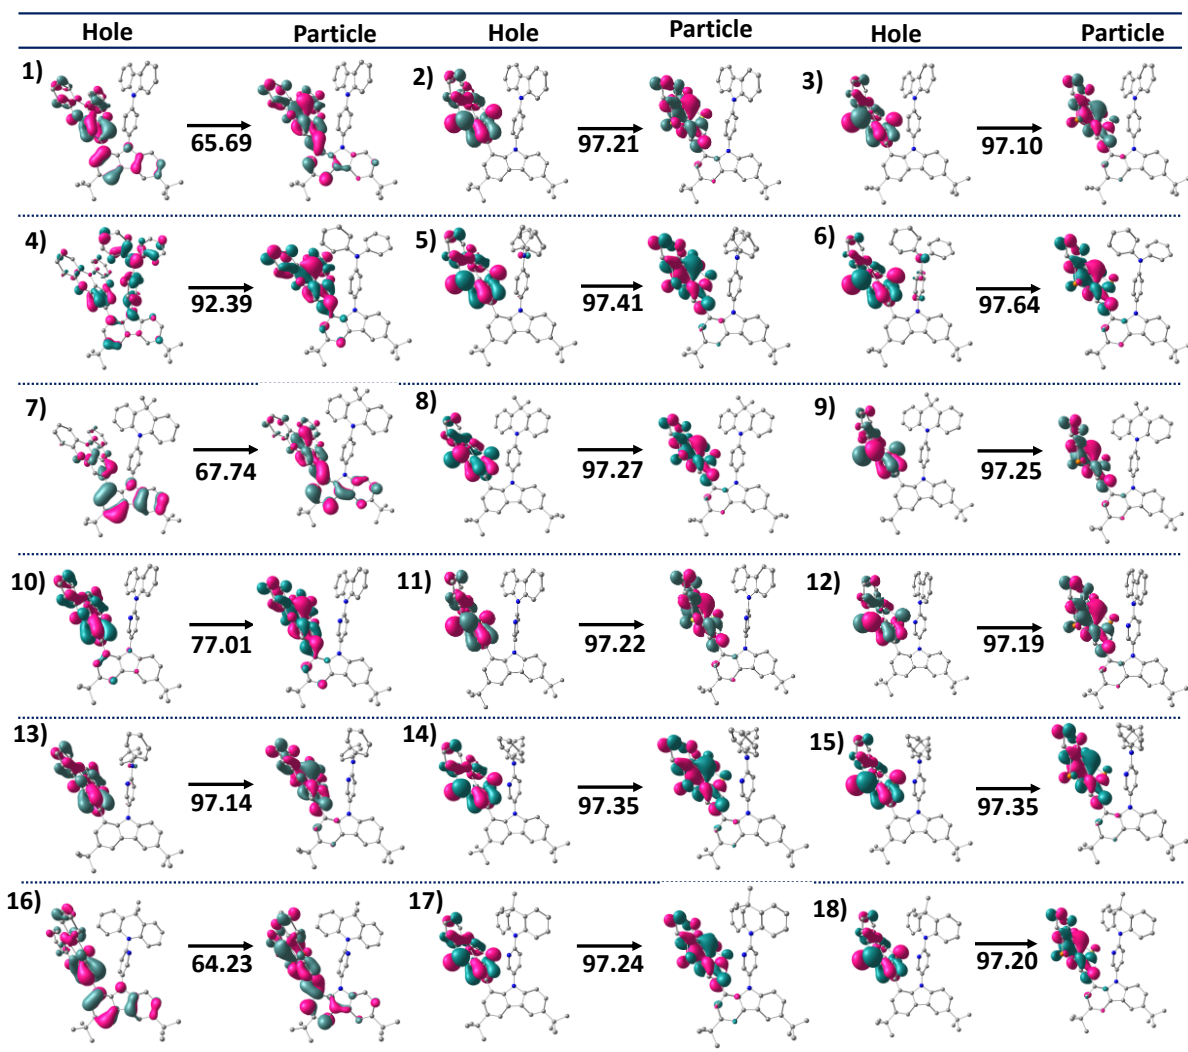

**Figure S12.** NTOs (iso-surface value = 0.02 a.u.) of designed molecules for  $T_1$  state at PBE0/6-31+G(d) in the toluene medium.

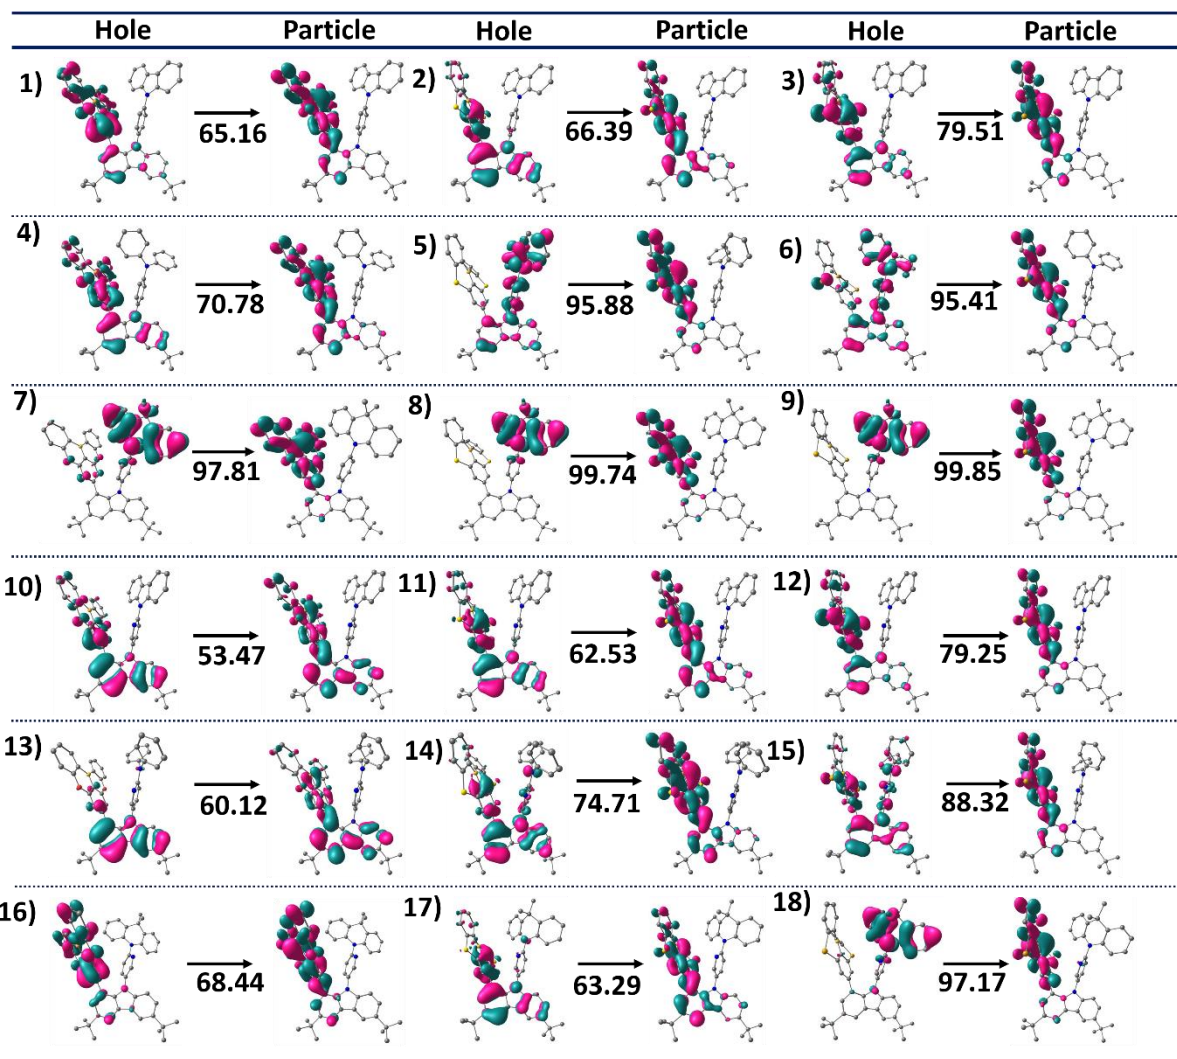

**Figure S13.** NTOs (iso-surface value = 0.02 a.u.) of designed molecules for T<sub>2</sub> state at PBE0/6-31+G(d) in the toluene medium.

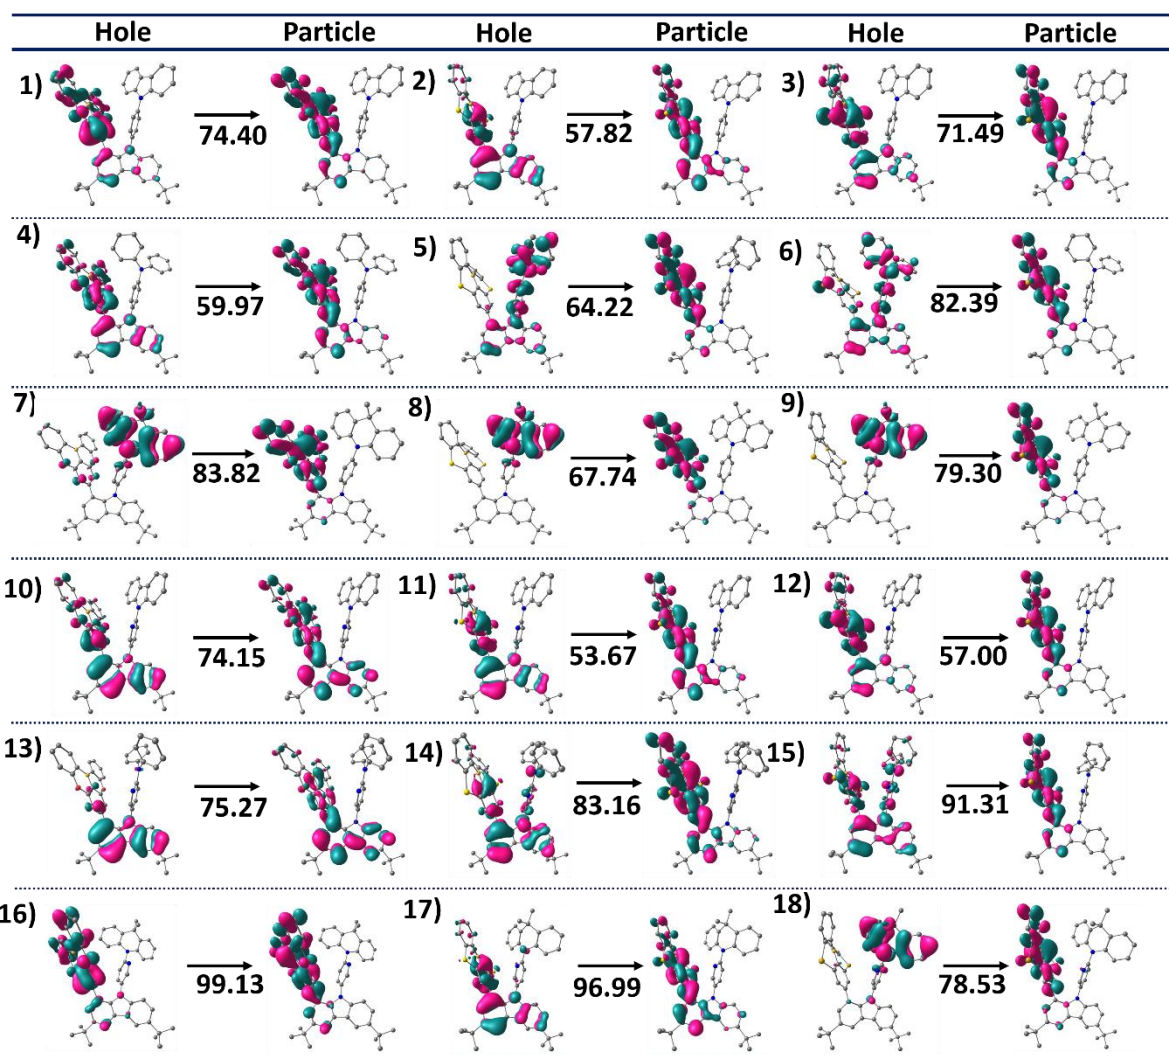

**Figure S14.** NTOs (iso-surface value = 0.02 a.u.) of designed molecules for T<sub>3</sub> state at PBE0/6-31+G(d) in the toluene medium.

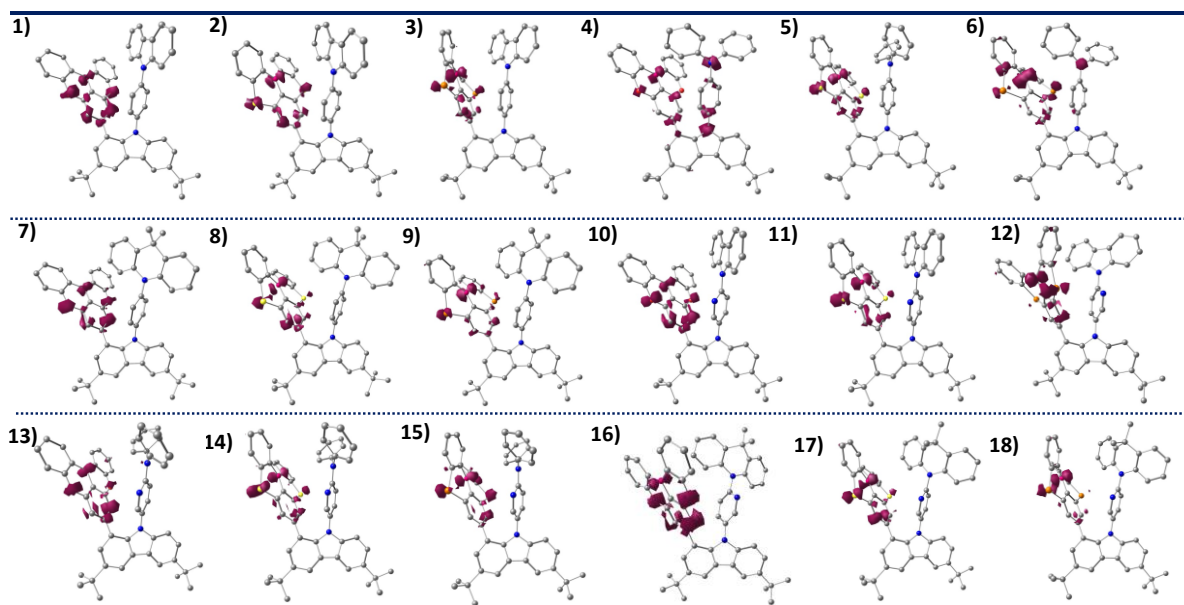

**Figure S15.** Spin density distributions of the designed molecules in their  $T_1$  state, computed at the PBE0/6-31+G(d) level of theory.

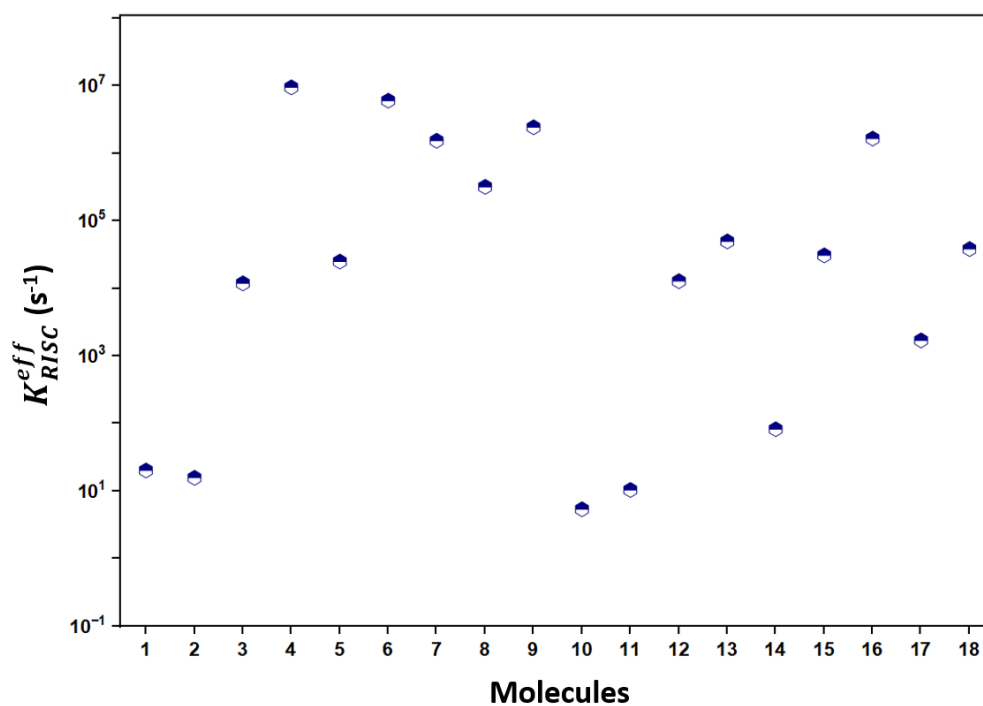

**Figure S16.** The effective RISC rate ( $K_{RISC}^{eff}$ ) constant for all designed molecules.

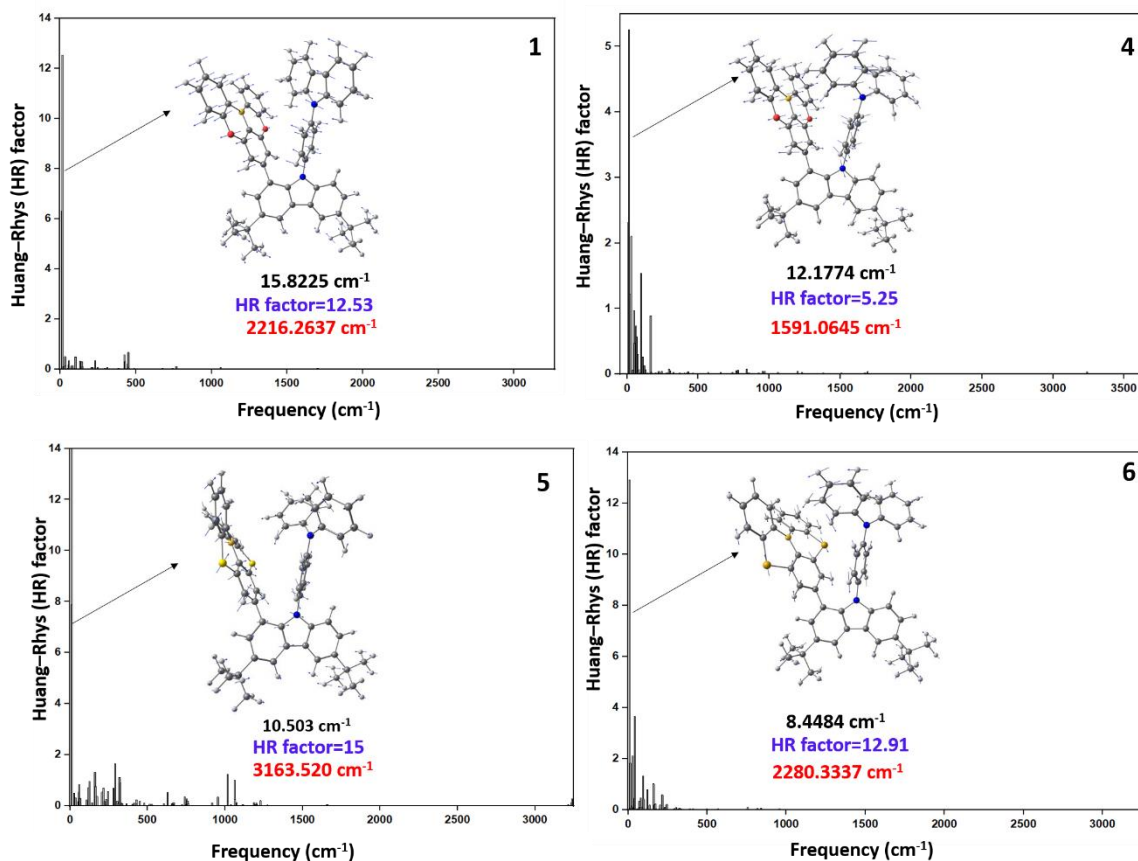

**Figure S17.** Calculated HR factors of all vibrational modes and reorganization energy (in red colour) in the  $S_1 \rightarrow S_0$  transition of molecules 1, 4, 5, & 6.

## Reference

- (1) Yang, T.; Qiu, N.; Lan, X.; Dong, X.; Tang, B. Z.; Zhao, Z. *J. Phys. Chem. C.*, 2024, **128** (38), 16085–16092.
- (2) P. K. Samanta, D. Kim, V. Coropceanu and J.-L. Brédas, *J. Am. Chem. Soc.*, 2017, **139**, 4042–4051.
- (3) Endo, A.; Sato, K.; Yoshimura, K.; Kai, T.; Kawada, A.; Miyazaki, H.; Adachi, C. *Appl. Phys. Lett.*, 2011, **98**, 083302.
- (4) Lee, S. Y.; Yasuda, T.; Komiyama, H.; Lee, J.; Adachi, C. *Adv. Mater.*, 2016, **28**, 4019–4024
- (5) Shakeel, U.; Singh, J. *Org. Electron.*, 2018, **59**, 121–124
